# Supplementary material for: Highly conductive and stable graphene/PEDOT:PSS composite as a metal free cathode for organic dye-sensitized solar cells
Source: Royal Society of Chemistry journal article supplement (doi:10.1039/c8ra02668h), 2018-01-01
Supplement: c8ra02668h1.pdf [file c8ra02668h1.pdf]

## Supporting Information

### **Highly Conductive and Stable Graphene/PEDOT:PSS Composite as Metal Free Cathode for Organic Dye-Sensitized Solar Cells**

Jae Cheon Kim<sup>a</sup>, Md. Mahbubur Rahman<sup>b</sup>, Myung Jong Ju<sup>c,\*</sup>, and Jae-Joon Lee<sup>a,\*</sup>

<sup>a</sup> *Department of Energy Materials and Engineering, Research Center for Photoenergy Harvesting & Conversion Technology (phct), Dongguk University, 26 Pil-dong, 3-ga, Jung-gu, Seoul, 04620, Republic of Korea.*

<sup>b</sup> *Nanotechnology Research Center & Department of Energy and Materials, Konkuk University, Chungju 27478, Republic of Korea.*

<sup>c</sup> *Ulsan National Institute of Science and Technology (UNIST), School of Energy and Chemical Engineering/Centre for Dimension-Controllable Organic Frameworks, 50, UNIST, Ulsan 44919, Republic of Korea.*

\*Corresponding author:

Email: jmj12@unist.ac.kr (M. J. Ju)

Tel : +82-2-2260-4979

Fax : +82-2-2268-8550

E-mail: jjlee@dongguk.edu (J.-J. Lee)

## Preparation of Counter Electrodes

The aqueous dispersion of PEDOT:PSS was diluted in ethanol (1:3 v/v) and sonicated for 30 min. After then, GnP powder with different weight percent (0.02, 0.1, 0.5, and 1 %) were added into the diluted PP solutions and sonicated for another 30 min. The well dispersed pure GnP (1 wt%) solution was prepared in 2-propanol by sonication for 30 min. The resulting solutions were deposition directly onto FTO glass (8  $\Omega$ /Sq. TEC-8, Pilkington) by using an electro-spray (e-spray) technique. Briefly, GnP, PP, and GnP/PP (with varying wt% of GnP) solutions were loaded into a plastic syringe equipped with a 23-gauge stainless steel hypodermic needle, which was connected to a high voltage power supply (ESN-HV30). A voltage of  $\sim 9$  kV was applied between a metal orifice and the FTO substrate at a distance of 3.5 cm. The feed rate was controlled by the syringe pump (KD Scientific, KDS220) at a constant flow rate of 50  $\mu$ L/min. The sample electrodes were obtained by an e-spray for 2 min, and then they were sintered at 80  $^{\circ}$ C for 30 min under vacuum. The GnP, PP, and different wt% GnP mixed PP-modified FTO electrodes were denoted as GnP, PP, PPG<sub>x</sub> (x = 1-4). As a reference, the Pt CEs were also prepared by spin coating of 5 mM ethanolic solution of chloroplatinic acid hexahydrate ( $\text{H}_2\text{PtCl}_6 \cdot 6\text{H}_2\text{O}$ ) on FTO and sintered in an electric muffle furnace at 400  $^{\circ}$ C for 20 min.

## Fabrication of a Symmetrical Dummy cell

A symmetrical dummy cell was fabricated with two identical Pt-, GnP-, PP-, or PPG<sub>x</sub> (x = 1-4)-FTO sheets, which were separated by 60- $\mu$ m thick Surlyn (Solaronix, Switzerland) tape as a sealant and spacer (active area, *ca.* 0.36 cm<sup>2</sup>). The sheet edges were coated by an ultrasonic soldering system (USS-9200, MBR Electronics) to improve the electrical contacts.

The cell was filled with the Co-complex electrolyte solution through a hole in one FTO support, which was finally sealed by Surlyn.

### **DSSCs Fabrication**

FTO glass plates were cleaned in a detergent solution using an ultrasonic bath for 30 min and then rinsed with water and ethanol. The FTO glass plates were immersed in  $\text{TiCl}_4$  (40 mM) at 70 °C for 30 min and washed with water and ethanol. A transparent nanocrystalline  $\text{TiO}_2$  layer on the FTO glass plates was prepared by screen printing  $\text{TiO}_2$  paste (Dyesol, 18NR-T) and then drying at 120 °C. The  $\text{TiO}_2$  electrodes were gradually heated under an air flow at 350, 375, 450, and 500 °C for 5, 5, 15, and 15 min, respectively. A paste for the scattering layer containing 400 nm anatase particles (CCIC, PST-400C) was deposited by screen printing and then dried for 1 h at 120 °C. Then, the  $\text{TiO}_2$  electrodes were gradually heated under an air flow at 350, 375, 450, and 500 °C for 5, 5, 15, and 15 min, respectively. The resulting layer was composed of a 6- $\mu\text{m}$  thick transparent layer and a 4- $\mu\text{m}$  thick scattering layer. The  $\text{TiO}_2$  electrodes were treated again with  $\text{TiCl}_4$  at 70 °C for 30 min and sintered at 500 °C for 30 min. A solar simulator equipped with a 200 W Xenon lamp (McScience, Polaronix® K201) was used to generate the simulated light AM 1.5G. A photovoltaic power meter (McScience, Polaronix® K101 LAB20) was used to measure the current density-voltage ( $J$ - $V$ ) curves. The incident light intensity was adjusted to  $100 \text{ mW cm}^{-2}$  (1 sun) by a standard mono-Si solar cell (PV Measurement Inc, PVM 396) being certified by US National Renewable Energy Laboratory. Incident-photon-to-current conversion efficiency (IPCE) spectra were measured by an IPCE measurement system (McScience, Polaronix® K3100) with 300 W xenon light source. The intensity of the incident

monochromatic light was also calibrated with the same standard mono-Si solar cell.

The sintered  $\text{TiO}_2$  electrodes were dipped into a THF/ethanol (v/v, 1/2) solution containing 0.1 mM Y123 dye (Dyename, Sweden) and 5 mM chenodeoxycholic acid (CDCA) (Sigma-Aldrich) co-adsorbent and kept at room temperature for 12 h. The dye loaded photoelectrodes (active area *ca.*  $0.25 \text{ cm}^2$ ) and the Pt, GnP, PP, and PPGx ( $x=1-4$ ) CEs were sandwiched by heating at  $80^\circ\text{C}$  with a hot-melt film ( $40\text{-}\mu\text{m}$  thickness, Surlyn) as a spacer and sealing between the electrodes. The liquid-type Co-complex electrolyte was injected into the cells through the drilled holes at the CE and the holes were sealed with cover glass using surlyn.

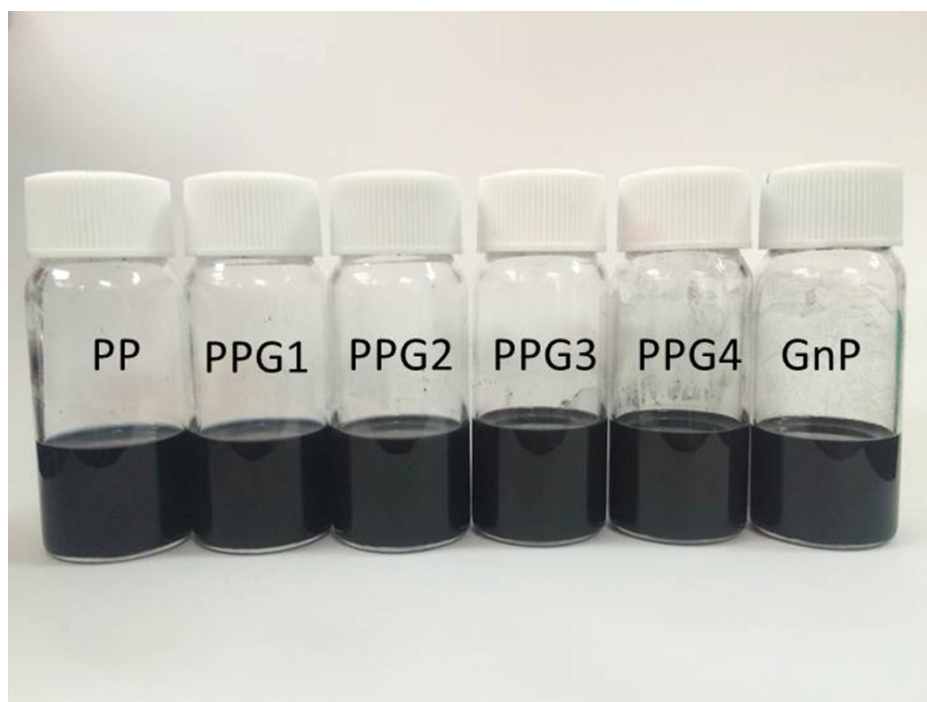

**Figure S1.** Photographic images of the dispersed PP, PP/GnPs (PPG<sub>x</sub>,  $x = 1, 2, 3, 4$ ).

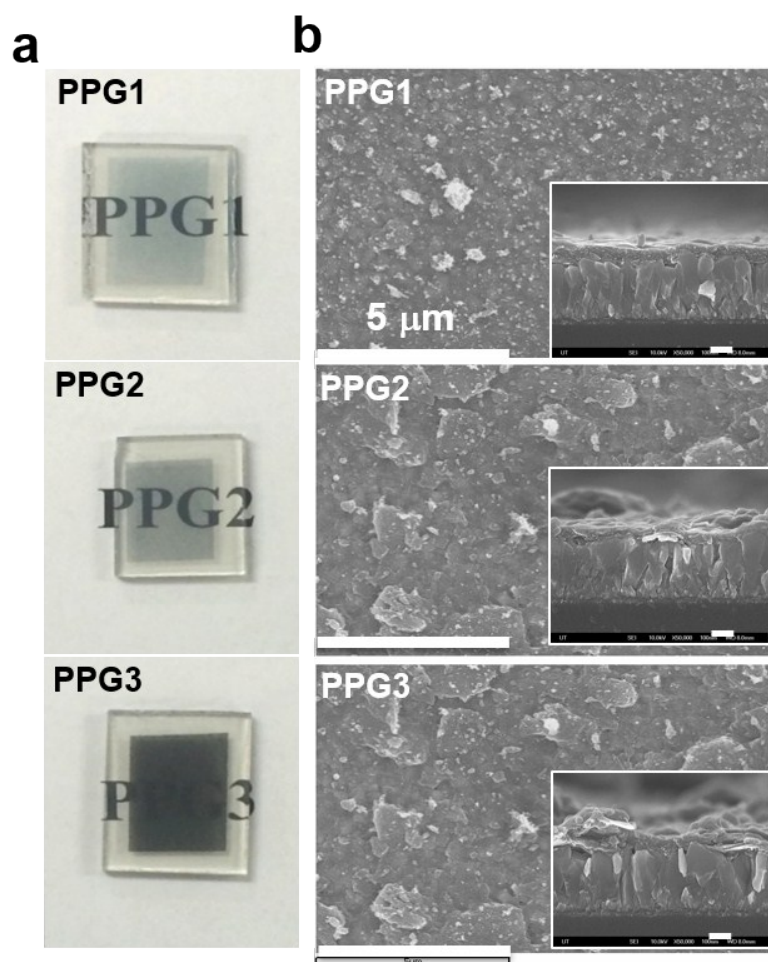

**Figure S2.** (a) Photographic images of the dispersed PP, PPG $x$  ( $x = 1, 2, 3$ ), and GnP samples. (b) Top view SEM images of PPG $x$ ,  $x=1, 2, 3$ . The insets are cross-section view SEM images of same films.

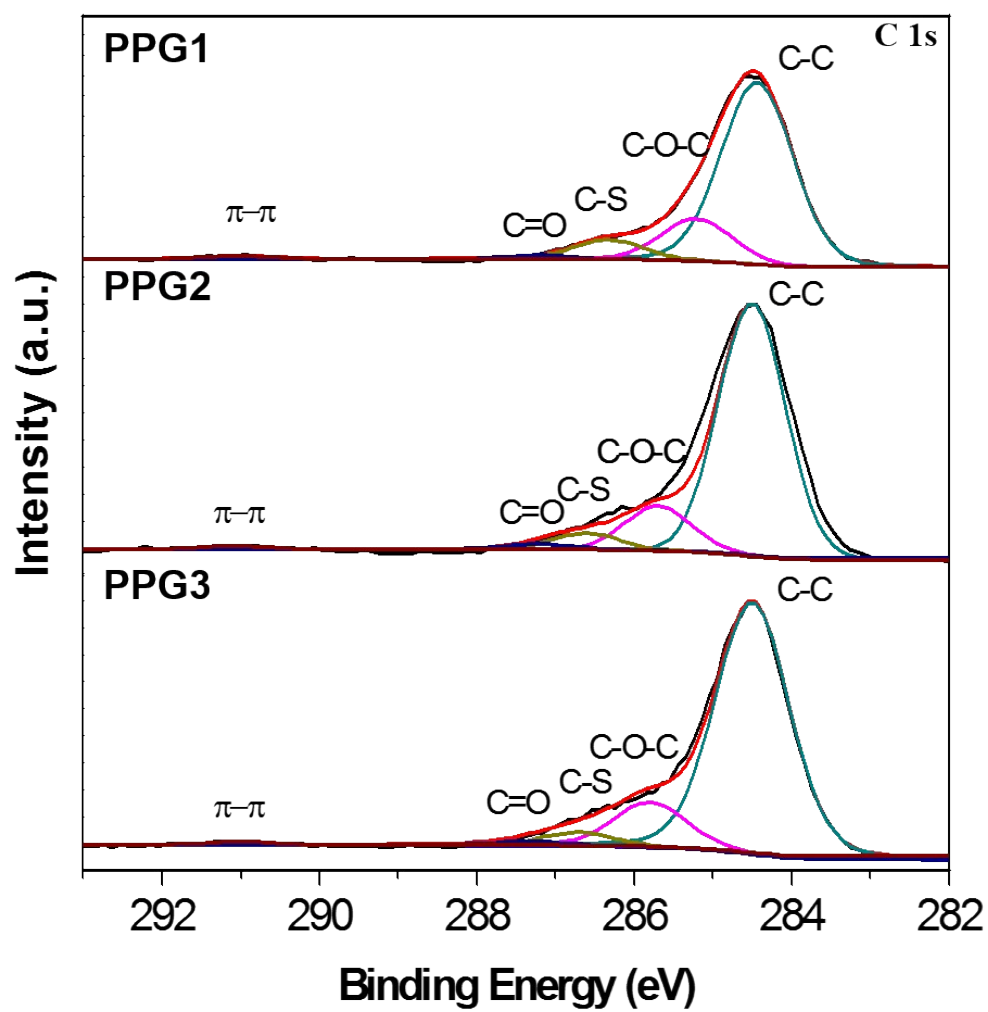

**Figure S3.** C 1s XPS peaks of PPG<sub>x</sub> (x = 1, 2, 3) samples.

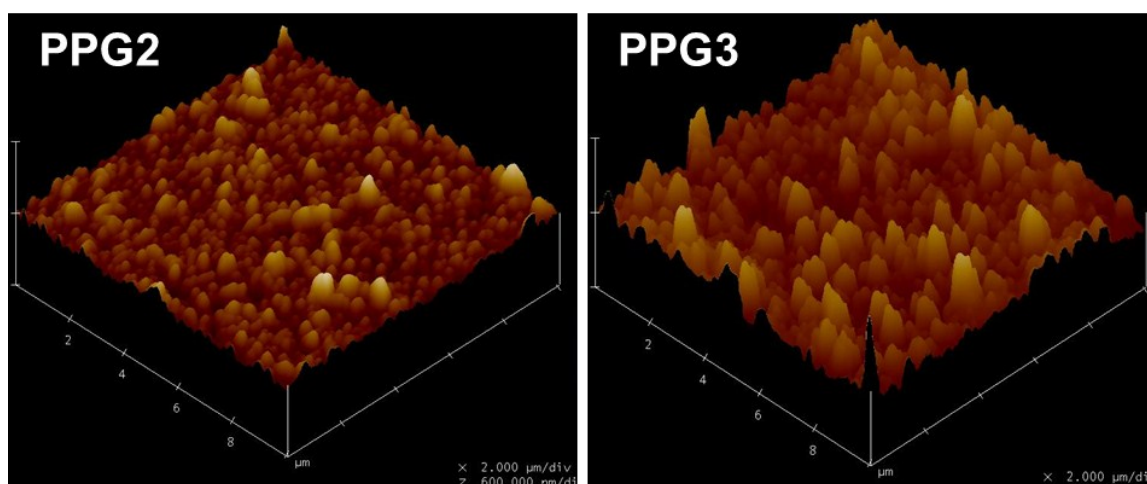

**Figure S4.** Topographical AFM images of the GnP, PP, and PPGx (x=2, 3) samples on FTO.

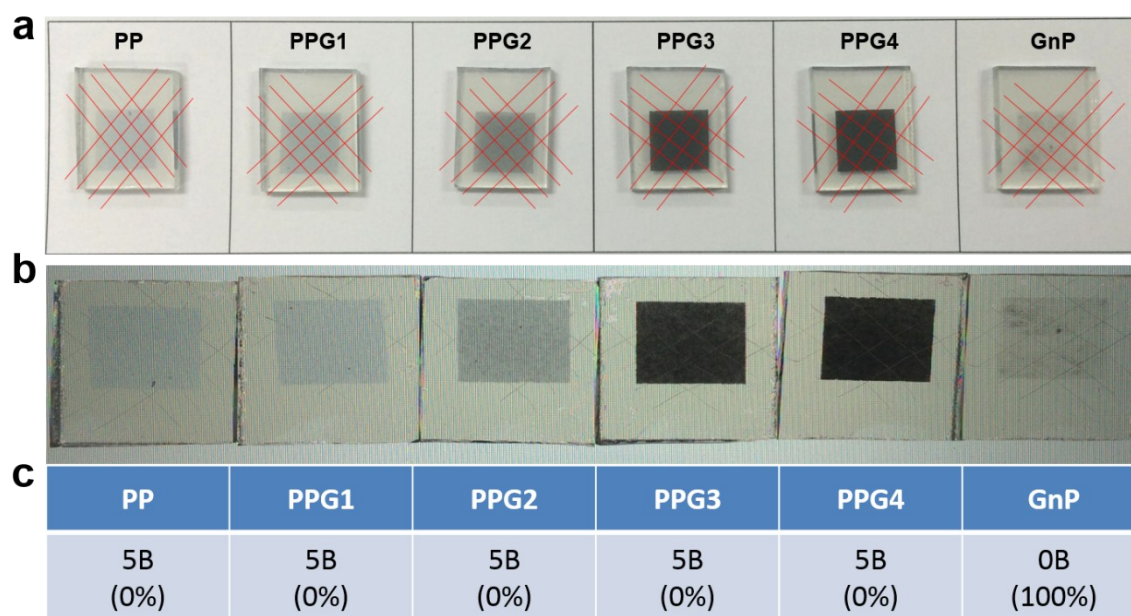

**Figure S5.** Top-view potgraphic images of the PP, PPG<sub>x</sub> (x = 1-4), and GnP films (a) as prepared, (b) after adhesion test using scotch tape, and (c) the percent of their peeling off from the FTO surface.

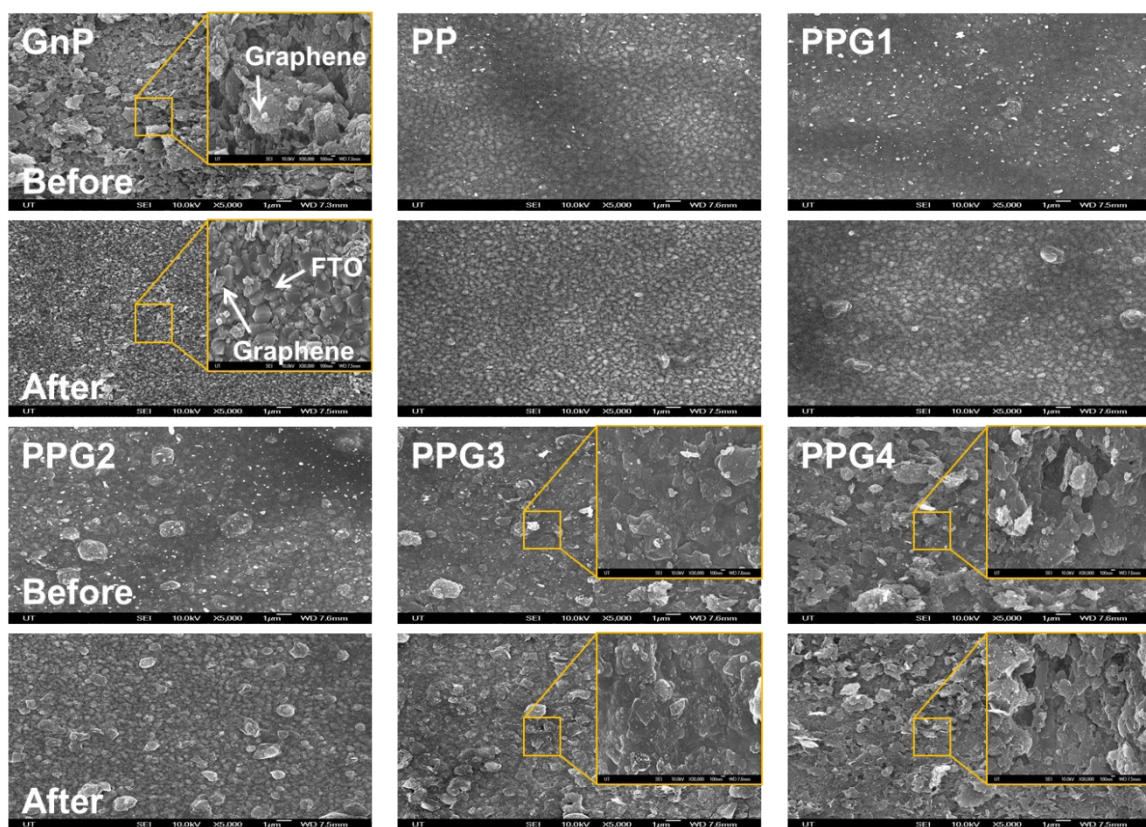

**Figure S6.** Top-view FE-SEM images of the GnP, PP, and PPG<sub>x</sub> (x = 1-4) samples before and after ‘scotch tape test’.

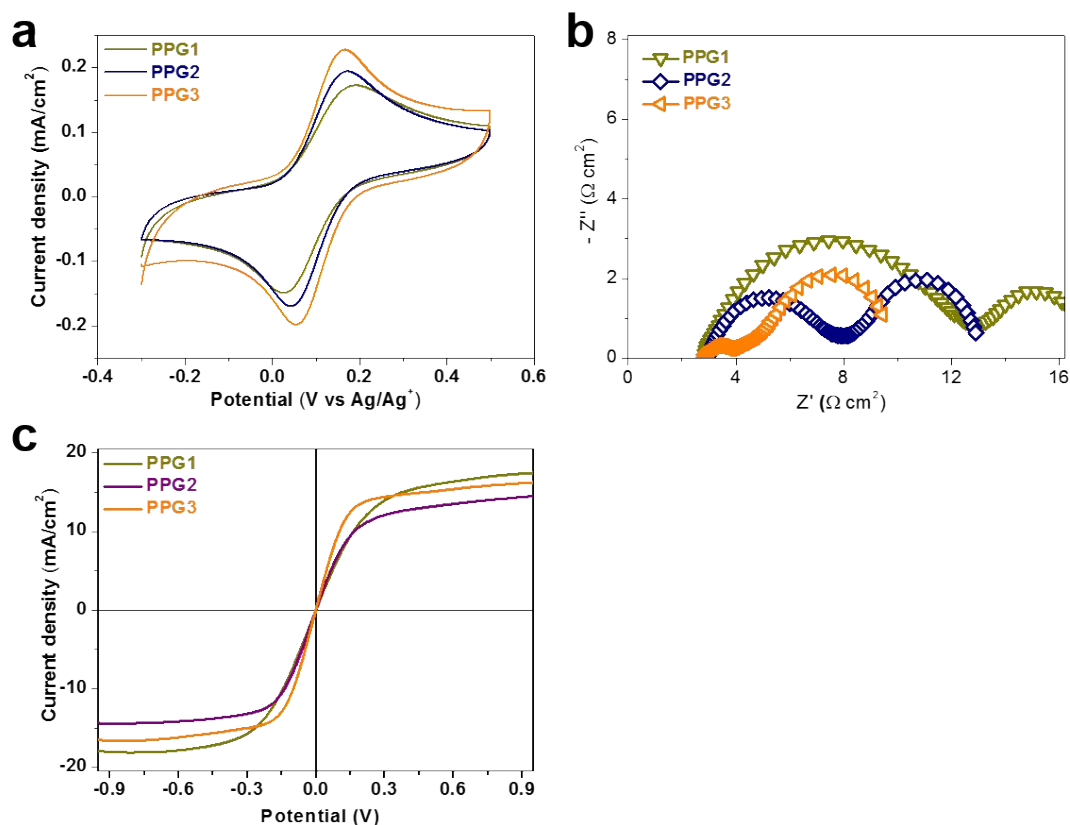

**Figure S7.** (a) CV plots of the PPGx (x=1, 2, 3) CE in 100 times lower concentration of  $\text{Co}(\text{bpy})_3^{2+/3+}$  redox couples used for a typical performance test in DSSC, and 0.1 M  $\text{LiClO}_4$  as the supporting electrolyte; scan rate: 10 mV/s. (b) Nyquist plots of the PPGx (x=1, 2, 3) symmetrical dummy cells. (c) Linear sweep voltammograms (LSV) of  $\text{Co}(\text{bpy})_3^{2+/3+}$  redox couples at PPGx (x=1, 2, 3) dummy cells; scan rate 10 mV/s.

The electro-active surface area was calculated according to the following Randles-Sevcik equation: S1,S2

$$A = \frac{I_p}{2.69 \times 10^5 \times n^{3/2} \times D^{1/2} \times v^{1/2} \times C} \quad (S1)$$

where,  $A$  is the electro-active surface area ( $\text{cm}^2$ ),  $I_p$  is the peak current ( $A$ ), and  $n = 1$ ,  $D$  is the diffusion coefficient obtained from the chronoamperometry (Figure 2c),  $V$  is the scan rate ( $V/s$ ),  $C$  is the concentration of  $\text{Co}(\text{bpy})_3^{2+/3+}$  ( $\text{mol/ml}$ ).

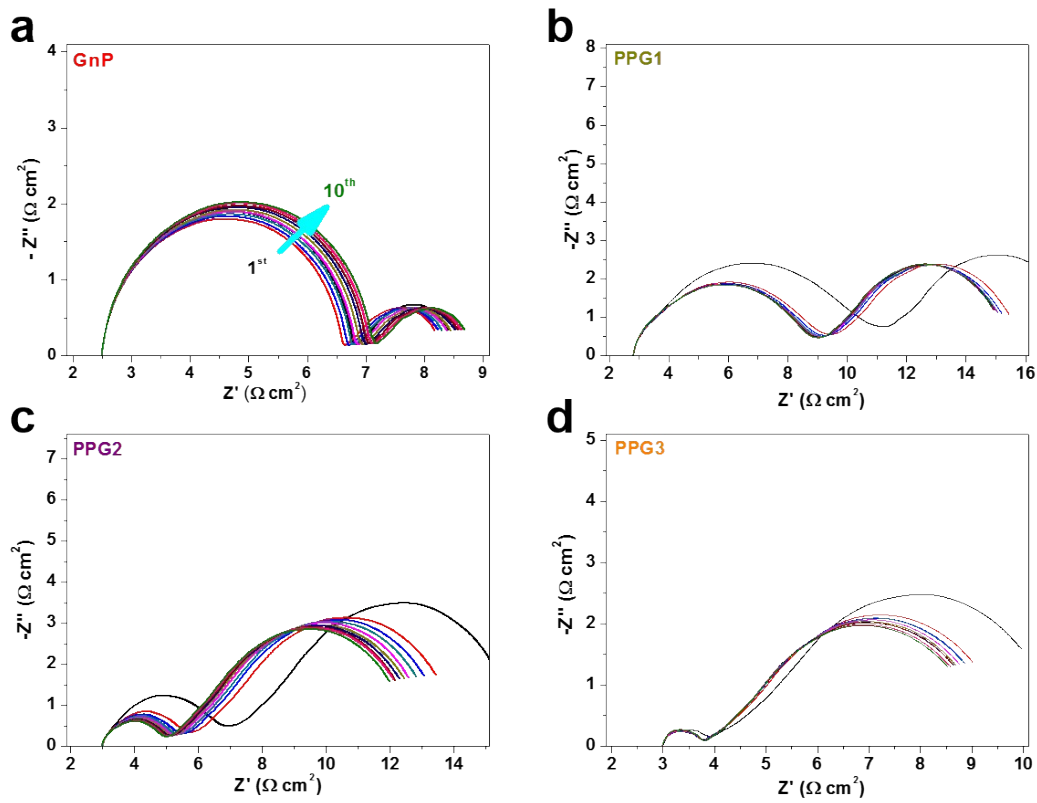

**Figure S8.** Nyquist plots of the PPGx ( $x=1, 2, 3$ ) CEs-based dummy cells under potential cycling in an acetonitrile solution of  $\text{Co}(\text{bpy})_3^{2+/3+}$ . The sequence of measurements was as follows:  $100 \times \text{CV}$  scans (from  $0 \text{ V} \rightarrow 1 \text{ V} \rightarrow -1 \text{ V} \rightarrow 0 \text{ V} \rightarrow 1 \text{ V}$ ; scan rate  $50 \text{ mV/s}$ );  $30 \text{ s}$

relaxation at 0 V; EIS measurements at 0 V from  $10^6$  to 0.1 Hz. This sequence of electrochemical stability testing was repeated 10 times.

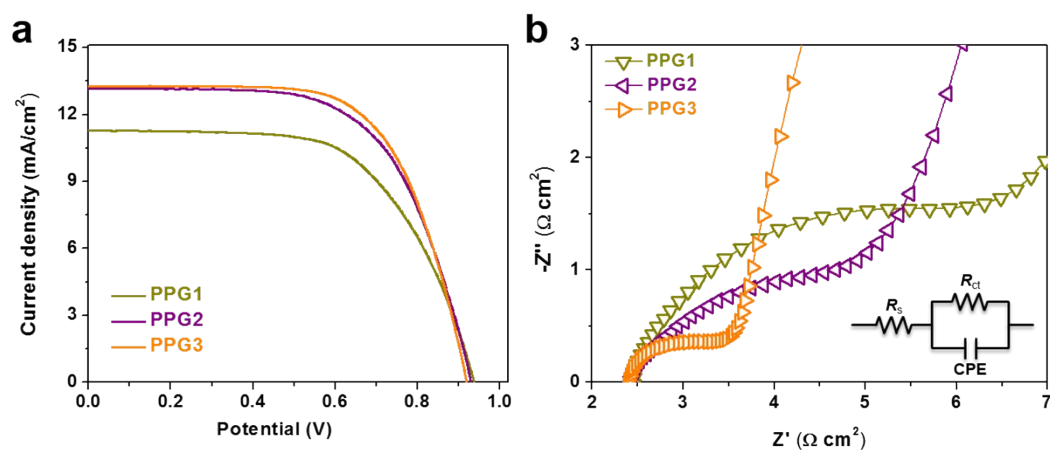

**Figure S9.** The  $J$ - $V$  characteristics of the DSSCs-based on PPG $x$  ( $x = 1, 2, 3$ ) CEs under one sun illumination (AM 1.5G).

**Table S1.**  $R_{CT}$  of the symmetrical dummy cells of the Pt, GnP, PP, and PPGx (x =1-4) CEs with respect to the potential cycling together with the  $R_{CT}$  of those CEs-based DSSCs.

| CEs  | $R_{ct}$ ( $\Omega$ cm <sup>2</sup> ) after 1 <sup>st</sup> CV cycle | $R_{ct}$ ( $\Omega$ cm <sup>2</sup> ) after 10 <sup>th</sup> CV cycle | $R_{ct}$ ( $\Omega$ cm <sup>2</sup> ) in real DSSCs |
|------|----------------------------------------------------------------------|-----------------------------------------------------------------------|-----------------------------------------------------|
| Pt   | 3.17                                                                 | 7.38                                                                  | 3.40                                                |
| GnPs | 2.34                                                                 | 2.52                                                                  | 4.95                                                |
| PP   | 3.0                                                                  | 1.93                                                                  | 6.68                                                |
| PPG1 | 3.97                                                                 | 3.01                                                                  | 7.72                                                |
| PPG2 | 1.89                                                                 | 0.98                                                                  | 5.67                                                |
| PPG3 | 0.53                                                                 | 0.41                                                                  | 2.15                                                |
| PPG4 | 0.1                                                                  | 0.3                                                                   | 0.94                                                |

## References

- S1. N. Papageorgiou, *Coord. Chem. Rev.*, 2004, **248**, 1421-1446.
- S2. Y. Xue, J. Liu. H. Chen, R. Wang, D. Li, J. Qu, L. Dai, *Angew. Chem. Int. Ed.*, 2012, **51**, 12124-12127.
